# Supplementary material for: Long-term mood/antidepressant effects of quetiapine extended-release formulation: an open-label, non-controlled extension study in Japanese patients with bipolar depression
Source: BMC Psychiatry. 2019 Jun 26;19:198. doi: 10.1186/s12888-019-2181-9 (PMC6595609; doi:10.1186/s12888-019-2181-9)
Supplement: Supplementary file 1 — Table S1: Adverse events that occurred in >5% of patients. (PDF 99 kb) [file 12888_2019_2181_MOESM1_ESM.pdf]

## Supplemental Table

**Table S1: Adverse events that occurred in >5% of patients**

|                                             | Quetiapine XR (n=179) |                        |
|---------------------------------------------|-----------------------|------------------------|
|                                             | Number of Patients    | Percentage of Patients |
| <b>GI Disorders</b>                         | <b>63</b>             | <b>35.2</b>            |
| Constipation                                | 21                    | 11.7                   |
| Nausea                                      | 10                    | 5.6                    |
| <b>General Disorders and Administration</b> | <b>71</b>             | <b>39.7</b>            |
| <b>Site Conditions</b>                      |                       |                        |
| Malaise                                     | 22                    | 12.3                   |
| Thirst                                      | 51                    | 28.5                   |
| <b>Infections and Infestations</b>          | <b>79</b>             | <b>44.1</b>            |
| Gastroenteritis                             | 9                     | 5.0                    |
| Nasopharyngitis                             | 58                    | 32.4                   |
| <b>Investigations</b>                       | <b>75</b>             | <b>41.9</b>            |
| ALT increased                               | 13                    | 7.3                    |
| Blood creatine phosphokinase increased      | 13                    | 7.3                    |
| Blood prolactin increased                   | 21                    | 11.7                   |
| Blood triglycerides increased               | 9                     | 5.0                    |
| Weight increased                            | 19                    | 10.6                   |
| <b>Nervous Systems Disorders</b>            | <b>115</b>            | <b>64.2</b>            |
| Akathisia                                   | 21                    | 11.7                   |
| Dizziness postural                          | 9                     | 5.0                    |
| Headache                                    | 12                    | 6.7                    |
| Somnolence                                  | 97                    | 54.2                   |

*GI* gastrointestinal, *ALT* alanine aminotransferase, *AST* aspartate aminotransferase
